# Supplementary material
Source: Research Square preprint supplement (doi:10.21203/rs.3.rs-8698391/v1)
Supplement: Supplementary file 1 [file 601af5010186680c8955fab9.docx]

Supplementary Material

**Supplementary Material 1.**

**Open coding results of the scale dimensions**

| Initial concept | Secondary category | Main category | |
| --- | --- | --- | --- |
| a1 Uphold the correct political direction;a2 Practice the core socialist values. | b1 Have great selflessness in mind and serve the country with utmost sincerity. | | c1 Professional Concept |
| a3 Respect the laws and characteristics of development; a4 Focus on individual differences. | b2 Equal Treatment, Respect for Differences | |
| a5 Observe infants and toddlers; a6 Understand needs; a7 Meet needs | b3observes carefully and responds actively. | |
| a8 Create a healthy environment; a9 Protect the safety of infants and young children; a10 Standardize activity arrangements. | b4 Safe and Healthy, Scientific and Standardized | |
| a11 Teaching willingness; a12 Sense of identity; a13 Values | b5 Professional Identity | | c2 Educational Sentiment |
| a14 enjoys being with infants and young children; a15 is caring, responsible, and patient; a16 respects the personality and rights of infants and young children. | b6 Caring for Infants and Young Children | |
| a17 Healthy Personality; a18 Emotion Regulation; a19 Positive Adaptation | b7 Personality Traits | |
| a20 Compliance with laws; a21 Honesty and trustworthiness; a22 Respect for rights and interests | b8 complies with laws and regulations and provides honest service. | | c3 Code of Ethics for Teachers |
| a23 Abides by job responsibilities; a24 Strong professional identity. | b9 Dedicating to work and duty, fulfilling responsibilities with utmost commitment. | |
| a25 Diligence and Hard Work; a26 Appropriate Childcare Philosophy; a27 Child-First Principle; a28 Professional Ethics and Integrity | b10 possesses noble character and excellent qualities. | |
| a29 Entering and exiting for meals and drinks; a30 Using the toilet and washing up; a31 Putting on and taking off clothes | b11 Planning Life Activities | | c4 Life Activity Arrangement and Organization |
| a32 Event Time Selection; A33 Activity Segment Transition | b12 organization life activities | |
| a34 Game Activity Design; a35 Game Material Adaptation; a36 Game Content Selection | b13 Designs Game Activities | | c5 Game Event Design and Guidance |
| a37 Meeting the needs of the game; a38 Creating a gaming environment; a39 Supporting game materials | b14 conducts gaming activities. | |
| a40 Select educational content; a41 Determine activity objectives; a42 Design activity plan. | b15 Designing Educational Activities | | c6 Educational Activity Design and Guidance |
| a43 Activity Implementation Method; a44 Observation of Activity Performance; a45 Provision of Appropriate Guidance | b16Oganizing educational activities | |
| a46 Analyze learning process; a47 Collect learning feedback; a48 Improve educational activities | b17 Implementing Educational Evaluation | |
| a49 Treat each other with sincerity; a50 Support each other; a51 Collaborate in nurturing. | b18 Getting along well with colleagues. | | c7 Communication and Collaboration |
| a52 Communication Method; a53 Communication Frequency; a54 Communication Ability | b19 Collaborating with Parents for Co-education | |
| a55 Community Parenting Support; a56 Community Resource Utilization | b20 and the community engage in friendly mutual assistance. | |
| a57 Mining Infant and Toddler Development Resources; a58 Integrating Parent Feedback Resources; a59 Coordinating Family Support Resources | b21 social resource integration | | c8 resource coordination |
| a60 Social Resource Participation; a61 Social Force Support | b22 Social Relationship Building | |
| a62 Consciousness of Autonomous Development; a63 Self-development Capability | b23 Development Plan | | c9 Learn How to Learn |
| a64 Information Platform Management; a65 WeChat Official Account Usage; a66 Digital Intelligence Resource Integration | b24 Digital Intelligence Application | |
| a67 Research Methods; a68 Research Questions; a69 Exploratory Methods | b25 Exploration and Research | |
| a70 Summary Reflection; a71 Evaluation Reflection; a72 Reflective Development | b26 Practical Reflection | | c10 Reflective Improvement |
| a73 Improved capabilities; a74 Evaluation strategy | b27 evaluation improvement | |
| a75 Sleep Environment; a76 Sleep Habits; a77 Sleep Care; a78 Sleep Issues | b28 Sleep Care | | c11 Life Care |
| a79 Eating Habits; a80 Dining Atmosphere; a81 Meal Assistance | b29 meal care | |
| a82 Toilet-related Issues; a83 Washing Methods; a84 Toilet Cleaning; a85 Clothing Change | b30 Cleaning Care | |
| a86 Drinking Water Standards; a87 Drinking Water Frequency | b31 Water Drinking Care | |
| a88 Disinfection of living environments; a89 Disinfection of household items; a90 Environmental cleaning | b32 cleaning  and disinfection | | c12 Health Management |
| a91 Life Hygiene; a92 Eye Hygiene; a93 Oral Hygiene | b33 Hygiene Habits | |
| a94 Protective Safety; a95 Safe Behavior; a96 Safety Rules | b34 Daily Security | | c13 Safety Care |
| a97 Emergency Handling of Accidental Injuries; a98 Allocation of First Aid Supplies; a99 Development of Emergency Plans | b35 emergency response | |
| a100 Assess developmental status; a101 Conduct dietary survey; a102 Adjust dietary plan | b36 Nutritional Assessment | | c14 Meal Arrangement |
| a103 Develop Recipes; a104 Add Complementary Foods; a105 Balance Diet | b37Dietary Pairing | |
| a106 Identification and Response; a107 Appropriate Response; a108 Active Cooperation | b38Respond in a  timely manner | | c15 Scientific Feeding |
| a109 On-demand feeding; a110 Responsive feeding | b39 Correct Feeding | |
| a111 Enrollment Check; a112 Health Observation; a113 Health Record | b40Health check | | c16 Health Check and Care |
| a114 Massage Touch; a115 Pediatric Tuina; a116 Appropriate Care | b41Health care | |
| a117 Common Disease Prevention; a118 Common Infectious Disease Identification; a119 Common Nutritional Disease Registration | b42Disease prevention | | c17 Disease Prevention and Care |
| a120 Care during the convalescent period for chronic diseases; a121 Infectious disease nursing | b43Disease care | |
| a122 Injury Prevention Plan Development; a123 Accident Injury Prevention; a124 Daily Life Injury Prevention | b44Common  Injury Prevention | | c18Accidental Injuries and First Aid |
| a125 Common Injury First Aid Skills; a126 Emergency Management of Accidental Injuries; a127 Prevention and Emergency Handling of Incidents | b45Accidental  Injury Management | |
| a128 Infant and Toddler Motor Development and Environmental Arrangement; a129 Infant and Toddler Cognitive Development and Environmental Arrangement; a130 Infant and Toddler Language Development and Environmental Arrangement; a131 Infant and Toddler Emotional-Social Development and Environmental Arrangement | b46Early  development environment | | c19Material environment |
| a132 activity space; a133 activity route | b47Living environment | |
| a134 Emotional Atmosphere; a135 Dining Atmosphere; a136 Communication Atmosphere | b48Class atmosphere | | c20  Psychological environment |
| a137 Parent-child Relationship; a138 Peer Relationship | b49Interpersonal relationships | |
| a139 Living Activity Observation Record; a140 Early Development Ability Observation Record | b50Observation Record | | c21Behavior Observation and Evaluation |
| a141 Activity Analysis and Evaluation; a142 Early Developmental Ability Analysis and Evaluation | b51Analysis and evaluation | |
| a143 Oral Developmental Abnormalities; a144 Vision and Hearing Abnormalities | b52Problem Identification | | c22Problem Identification and Guidance |
| a145 Guidance on Abnormal Performance; a146 Developing Personalized Guidance Plans; a147 Assisting Doctors with Correction Training | b53Development guidance | |
| a148 Uses evaluation tools; a149 Monitors development indicators; a150 Assesses growth status. | b54Parenting Assessment | | c23Parenting Evaluation and Assessment |
| a151 Assess the regional environment; a152 Assess the nurturing environment | b55Environmental Assessment | |
| a153 Parenting Philosophy; a154 Parenting Methods; a155 Parenting Consultation | b56Parenting Guidance | | c24Parenting Guidance and Counseling |
| a156 Developmental Environment Consultation; a157 Nurturing Environment Consultation; a158 Developmental Issues Consultation | b57Resource Consulting | |

**Supplementary Material 2.**

**Number of Initial Items per Dimension and Reference Sources**

| **Level 1 Dimension** | **Level 2 Dimensions and**  **Initial Number of Items** | **Existing Framework or**  **Policy Text Name** | **Reference Source** |
| --- | --- | --- | --- |
| Competence to practice  teachers' morality | Professional Philosophy (6 items)  Code of Ethics for  Teachers(4items) | Professional Code of Conduct for Chinese Childcare Practitioners (Trial),Early Years Teachers’ Standards in the United Kingdom | National Health Commission,2021；Lester, Stan，2014 |
| Responsive caregiving competence | Positive Responses (4 items)  Daily Care (6 items) Nutrition and Feeding (5 items) Hygiene and Disinfection (4 items) Safety Supervision (4 items) | Guidelines for Childcare in Chinese Nursery Institutions (Trial),Nurturing Care for Early Childhood Development: a framework for helping children survive and thrive to transform health and human potential,Framework for Professional Competence of caregivers s in Childcare Institutions | National Health Commission of China, 2021; UNICEF et al., 2018; Hong et al., 2024 |
| Health management competence | Health Check and Healthcare (4 items)  Disease Prevention and Care (4 items)  Injury Prevention and Management (3 items)  Developmental Screening and Intervention (4 items) | Training Outline for Childcare Personnel in Early Childhood Care Institutions (Trial Implementation), Singapore's Skills Framework for Infant and Toddler Care and Education (0-3 Years), Core Competency Framework for Childcare Teachers | National Health Commission of China, 2021; Yang et al., 2021; Yang et al., 2022 |
| Early development support competence | Activity Organization and Support (3 items)  Behavior Observation and Evaluation (3 items)  Environment Creation and Utilization (5 items)  Need Identification and Response (2 items) | Framework for Core Competencies of Childcare teachers, Framework for Core Knowledge and Abilities of Childcare teachers, and Japan's Childcare teachers Qualification Examination System | Yang et al., 2022; Huang et al., 2019;; Chang, K. H., 2014 |
| family-childcare collaboration competence | Development Assessment and Evaluation (3 items)  Problem Identification and Response (4 items)  Family Counseling and Guidance (4 items) | National Occupational Skill Standards for Child Development Guides in China, National Occupational Skill Standards for Childcare Workers in China;NAEYC standards for initial & advanced early childhood professional preparation programs in the United States | Ministry of Human Resources and Social Security of the People's Republic of China, 2019； NAEYC，2010 |
| communication and collaboration competence | Communication and Cooperation (3 items)  Resource Collaboration (3 items) | Indicator System for Core Competence of Childcare Teachers;Framework for Core Knowledge and Abilities of Childcare teachers | Ye et al., 2022; Wong et al., 2019 |
| career development planning competence | Self-Development (3 items)  Reflection and Improvement (2 items) | Indicator System for Core Competence of Childcare Teachers;System of Functional Competency Indicators for Childcare Teachers;Competency Model for Childcare Teachers | Ye et al., 2022; Qin et al., 2023; Deng n et al., 2024 |
| information technology application competence | Application of Intelligent Technology (3 items)  Information Integration Management (2 items) | Indicator System for Core Competence of Childcare Teachers;System of Functional Competency Indicators for Childcare Teachers; | Ye et al., 2022; Qin et al., 2023; |
| marketing and management competence | Promotion and Publicity (3 items)  Management and Operations (2 items) | The National Quality Standard for Early Childhood Education and Care in Australia;Management Specifications for Infant and Toddler Care Institutions (Trial) | Ha, N. T. N et al., 2025; National Health Commission of the People's Republic of China, 2019 |

**Supplementary Material 3.**

**Results of the First Round of Expert Consultation**

| **Item content** | **SD** | **M** | **CV** | **F** | **Result** |
| --- | --- | --- | --- | --- | --- |
| 1.I can show care and affection for every infant and young child, with love and responsibility, and work meticulously and patiently. | 0.858 | 4.455 | 0.193 | 0.682 | Modify |
| 2. I am passionate about childcare work and recognize the significance and value of childcare services. | 0.213 | 4.955 | 0.043 | 0.955 | Retain |
| 3. I have the correct values, positive emotions, and a professional spirit that respects and cherishes life and is willing to devote myself to my work. | 0.727 | 4.364 | 0.167 | 0.500 | Delete |
| 4. I can adopt an infant- and toddler-centered approach, respecting their personalities and rights, and treating every infant and toddler with fairness and equality. | 0.351 | 4.864 | 0.072 | 0.864 | Retain |
| 5. I can respect the growth characteristics and patterns of infants and young children, pay attention to individual differences, and promote the overall development of each child. | 0.671 | 4.455 | 0.151 | 0.546 | Modify |
| 6. I can appropriately arrange infants' and toddlers' daily routines and activities, ensuring their safety and health to the greatest extent and meeting their growth and developmental needs. | 0.666 | 4.409 | 0.151 | 0.500 | Modify |
| 7. I can respect the legitimate rights and interests of infants, toddlers, and their families, and consciously adhere to childcare service standards and regulations. | 0.551 | 4.727 | 0.116 | 0.773 | Retain |
| 8. I possess the ability to implement the policies, laws, and regulations of the Party and the state regarding infant and toddler care. | 1.024 | 4.000 | 0.256 | 0.364 | Delete |
| 9. I can comply with professional ethics, fulfill due obligations in childcare practice, and demonstrate a sense of social responsibility and commitment. | 0.294 | 4.909 | 0.060 | 0.909 | Retain |
| 10.I can safeguard the rights of infants and toddlers, maintaining objective, fair, and impartial professional ethics and conduct. | 0.727 | 4.364 | 0.167 | 0.500 | Delete |
| 11.I can understand the needs expressed non-verbally by infants and toddlers through their movements, sounds, expressions, and verbal requests. | 0.477 | 4.682 | 0.102 | 0.682 | Retain |
| 12.I can interact with infants and toddlers using non-verbal communication techniques such as hugging, touching, eye contact, and facial expressions. | 0.395 | 4.818 | 0.082 | 0.818 | Retain |
| 13. I can promptly respond to the needs of infants and toddlers during daily activities such as eating, drinking, cleaning, and sleeping. | 0.492 | 4.636 | 0.106 | 0.636 | Retain |
| 14.I can create a warm emotional atmosphere, support emotional expression in infants and toddlers, and foster positive emotional attachments. | 0.492 | 4.636 | 0.106 | 0.636 | Retain |
| 15. I am proficient in methods for infant and toddler hygiene, such as brushing teeth, washing hands, washing faces, rinsing mouths, and wiping noses. | 0.510 | 4.546 | 0.112 | 0.546 | Retain |
| 16. I can create a quiet and suitable sleep environment, cultivating regular bedtime and independent sleeping habits in infants and toddlers. | 0.477 | 4.682 | 0.102 | 0.682 | Retain |
| 17. I can recognize signs of drowsiness in infants and toddlers, assess their sleep-related mental state, and guide their sleeping positions. | 0.510 | 4.546 | 0.112 | 0.546 | Retain |
| 18.I can change diapers promptly and guide infants and toddlers in using the toilet independently. | 0.429 | 4.773 | 0.090 | 0.773 | Retain |
| 19.I can create a pleasant dining environment, encouraging infants and toddlers to focus on eating and avoid picky eating habits. | 0.351 | 4.864 | 0.072 | 0.864 | Retain |
| 20. I can guide infants and toddlers in using cups for drinking, fostering good hydration habits. | 0.294 | 4.909 | 0.060 | 0.909 | Retain |
| 21.I can assess the nutritional value of infants' and toddlers' daily diets. | 1.046 | 4.046 | 0.258 | 0.409 | Delete |
| 22. I can respond promptly to feeding needs based on infants' and toddlers' hunger or fullness cues. | 0.213 | 4.955 | 0.043 | 0.955 | Retain |
| 23.I can plan and arrange the daily diets of infants and toddlers. | 0.503 | 4.591 | 0.110 | 0.591 | Retain |
| 24.I can introduce complementary foods and develop meal plans according to the age-specific characteristics of infants and toddlers. | 0.395 | 4.818 | 0.082 | 0.818 | Retain |
| 25.I can assist infants and toddlers with eating, prepare formula milk, and master feeding techniques. | 0.351 | 4.864 | 0.072 | 0.864 | Retain |
| 26.I can limit screen time and help infants and toddlers develop good eye care habits. | 0.456 | 4.727 | 0.096 | 0.727 | Retain |
| 27. I can guide infants and toddlers in brushing their teeth on time, fostering good oral hygiene habits. | 0.590 | 4.591 | 0.129 | 0.636 | Retain |
| 28. I can maintain indoor and outdoor environmental hygiene through cleaning and disinfection, as well as washing and storing sanitary tools. | 0.528 | 4.773 | 0.111 | 0.818 | Retain |
| 29. I can clean and disinfect daily items such as bedding, toys, and bottles. | 0.528 | 4.773 | 0.111 | 0.818 | Retain |
| 30. I can help infants and toddlers develop safety awareness, understand and follow simple safety rules. | 0.551 | 4.727 | 0.116 | 0.773 | Retain |
| 31. I can promptly identify and stop behaviors in infants and toddlers that may lead to dangerous outcomes. | 0.528 | 4.773 | 0.111 | 0.818 | Retain |
| 32. I can appropriately allocate emergency supplies in childcare facilities. | 0.468 | 4.864 | 0.096 | 0.909 | Retain |
| 33. I can prevent and respond to emergencies such as earthquakes, fires, stampedes, and violent attacks. | 0.468 | 4.864 | 0.096 | 0.909 | Retain |
| 34. I can conduct full-day health checks and record the health information of infants and toddlers. | 0.213 | 4.955 | 0.043 | 0.955 | Retain |
| 35. I am proficient in the methods of air baths, sun baths, and water baths for infants and toddlers. | 0.429 | 4.773 | 0.090 | 0.773 | Retain |
| 36. I can massage the head, chest, abdomen, back, and limbs of infants and toddlers and possess basic massage techniques. | 0.590 | 4.591 | 0.129 | 0.636 | Retain |
| 37. I can care for infants and toddlers who have suffered serious injuries while awaiting rescue. | 0.510 | 4.546 | 0.112 | 0.546 | Retain |
| 38. I can prevent and manage common illnesses in infants and toddlers, such as fever, vomiting, diarrhea, convulsions, and upper respiratory infections. | 0.501 | 4.818 | 0.104 | 0.864 | Retain |
| 39. I am capable of preventing and caring for common infectious diseases in infants and young children, such as hand-foot-and-mouth disease, herpangina, influenza, and chickenpox. | 0.351 | 4.864 | 0.072 | 0.864 | Retain |
| 40. I am capable of preventing and caring for common chronic diseases in infants and young children, such as congenital heart disease, asthma, and epilepsy. | 0.492 | 4.636 | 0.106 | 0.636 | Retain |
| 41. I am capable of preventing and caring for common nutritional diseases in infants and young children, such as anemia, malnutrition, overweight, and obesity. | 0.568 | 4.682 | 0.121 | 0.727 | Retain |
| 42. I am capable of preventing common injuries in infants and young children, such as burns, bleeding from trauma, bumps, dislocations, and fractures. | 0.429 | 4.773 | 0.090 | 0.773 | Retain |
| 43. I am capable of handling common injuries in infants and young children, such as suffocation, falls, drowning, poisoning, foreign body obstruction, and animal-related injuries. | 0.858 | 4.546 | 0.189 | 0.727 | Retain |
| 44. I am proficient in basic emergency rescue techniques, including infant and child cardiopulmonary resuscitation (CPR). | 0.351 | 4.864 | 0.072 | 0.864 | Retain |
| 45. I can use assessment tools to evaluate the physical and mental development of infants and young children and identify developmental abnormalities. | 0.213 | 4.955 | 0.043 | 0.955 | Retain |
| 46. I can screen for oral developmental abnormalities, dental caries, low vision, or hearing abnormalities in infants and young children. | 0.477 | 4.682 | 0.102 | 0.682 | Retain |
| 47. I can provide early intervention and timely referrals for infants and young children with autism, oral developmental abnormalities, low vision, or hearing abnormalities. | 0.666 | 4.591 | 0.145 | 0.682 | Retain |
| 48. I can collaborate with professional doctors to correct, train, and provide family guidance for premature infants and infants with common developmental deviations. | 0.492 | 4.636 | 0.106 | 0.636 | Retain |
| 49. I can plan daily life activities for infants and young children, such as sleep, hygiene, meals, and hydration. | 0.503 | 4.591 | 0.110 | 0.591 | Retain |
| 50. I can design play activities suitable for the age characteristics of infants and young children. | 0.456 | 4.727 | 0.096 | 0.727 | Retain |
| 51. I can organize and implement early development activities for infants and young children, including motor, language, cognitive, emotional, and social skills. | 0.528 | 4.773 | 0.111 | 0.818 | Retain |
| 52. I can sensitively observe and record the behavioral performance of infants and young children during various activities. | 0.716 | 4.682 | 0.153 | 0.773 | Retain |
| 53. I can correctly analyze the behavioral performance of infants and young children during various activities. | 0.477 | 4.682 | 0.102 | 0.682 | Retain |
| 54. I can scientifically evaluate the development level of infants and young children and propose improvement strategies. | 0.477 | 4.682 | 0.102 | 0.682 | Retain |
| 55. I can create a safe, suitable, and exploratory early development environment for infants and young children. | 0.740 | 4.500 | 0.164 | 0.636 | Retain |
| 56. I can provide infants and young children with rich activity materials, clearly labeled for easy access. | 0.568 | 4.682 | 0.121 | 0.727 | Retain |
| 57. I can create a positive classroom atmosphere for infants and young children. | 0.492 | 4.636 | 0.106 | 0.636 | Retain |
| 58. I can foster a warm teacher-infant relationship for infants and young children. | 0.671 | 4.455 | 0.151 | 0.546 | Retain |
| 59. I can build harmonious peer relationships for infants and young children. | 0.501 | 4.818 | 0.104 | 0.864 | Retain |
| 60. I can accurately assess the developmental needs of infants and young children in motor, cognitive, language, emotional, and social areas. | 0.477 | 4.682 | 0.102 | 0.682 | Retain |
| 61. I can appropriately respond to the developmental needs of infants and young children in motor, cognitive, language, emotional, and social areas and provide guidance. | 0.456 | 4.727 | 0.096 | 0.727 | Retain |
| 62. I can guide caregivers in using assessment tools to monitor the physical and mental development of infants and young children. | 0.590 | 4.591 | 0.129 | 0.636 | Retain |
| 63. I can evaluate caregivers' parenting concepts, behaviors, and psychological status. | 0.528 | 4.773 | 0.111 | 0.818 | Retain |
| 64. I can evaluate the layout and spatial arrangement of infants and young children's homes. | 0.528 | 4.773 | 0.111 | 0.818 | Retain |
| 65. I can guide caregivers in identifying different physical constitutions of infants and young children and provide tailored care. | 0.551 | 4.727 | 0.116 | 0.773 | Retain |
| 66. I can guide caregivers in identifying common issues related to eating, toileting, and sleeping in infants and young children and provide appropriate responses. | 0.528 | 4.773 | 0.111 | 0.818 | Retain |
| 67. I can guide caregivers in identifying abnormal sleep habits, eating habits, and hygiene habits in infants and young children and provide appropriate responses. | 0.666 | 4.591 | 0.145 | 0.682 | Retain |
| 68. I can guide caregivers in identifying abnormal motor, cognitive, language, emotional, and social behaviors in infants and young children and provide appropriate responses. | 0.492 | 4.636 | 0.106 | 0.636 | Retain |
| 69. I can communicate with caregivers about the performance of infants and young children and explain developmental assessment results. | 0.503 | 4.591 | 0.110 | 0.591 | Retain |
| 70. I can recommend suitable venues, activities, lectures, training, and materials to caregivers. | 0.456 | 4.727 | 0.096 | 0.727 | Retain |
| 71. I can guide caregivers in mastering responsive caregiving and parent-child activity skills. | 0.551 | 4.727 | 0.116 | 0.773 | Retain |
| 72. I can guide caregivers in correcting parenting behaviors and improving the caregiving environment. | 0.727 | 4.636 | 0.157 | 0.727 | Retain |
| 73. I can fully communicate with colleagues about infants and young children's information and collaborate on activities. | 0.802 | 4.500 | 0.178 | 0.636 | Retain |
| 74. I can use digital technology and information technology to expand home-care communication channels. | 0.492 | 4.636 | 0.106 | 0.636 | Retain |
| 75. I can collaborate with communities to provide parenting support for parents. | 0.740 | 4.500 | 0.164 | 0.636 | Retain |
| 76. I am proactive in engaging in cross-disciplinary and cross-professional collaborative learning. | 0.294 | 4.909 | 0.060 | 0.909 | Retain |
| 77. I can identify educational resources within families to promote early development in infants and young children. | 0.477 | 4.682 | 0.102 | 0.682 | Retain |
| 78. I can promote the involvement of social resources to support infant and child development, such as coordinating community and other outdoor spaces and organizing visits to museums, science centers, and botanical gardens. | 0.671 | 4.455 | 0.151 | 0.546 | Modify |
| 79. I can promptly regulate negative emotions and prevent them from affecting my work. | 0.429 | 4.773 | 0.090 | 0.773 | Retain |
| 80. I can develop practical long-term or short-term personal professional development plans. | 0.351 | 4.864 | 0.072 | 0.864 | Retain |
| 81. I actively reflect on and summarize practical experiences to improve childcare services. | 0.492 | 4.636 | 0.106 | 0.636 | Retain |
| 82. I can use critical thinking to analyze childcare practice issues and attempt to solve them. | 0.477 | 4.682 | 0.102 | 0.682 | Retain |
| 83. I can conduct self-diagnosis and evaluation to improve childcare services. | 0.395 | 4.818 | 0.082 | 0.818 | Retain |
| 84. I am proficient in using thermometers, weighing scales, electronic blood pressure monitors, and smart dolls. | 0.492 | 4.636 | 0.106 | 0.636 | Retain |
| 85. I can operate intelligent simulation learning systems for infant and child care services. | 0.492 | 4.636 | 0.106 | 0.636 | Retain |
| 86. I can apply digital technology to infant and child play activities, early development activities, and home-care collaboration activities. | 0.796 | 4.409 | 0.181 | 0.546 | Delete |
| 87. I can integrate videos, audios, animations, and text materials related to infant and child development with childcare service development. | 0.902 | 4.364 | 0.207 | 0.591 | Modify |
| 88. I am familiar with infant and child health platform management methods, can manage infant and child health data, and record electronic growth files for infants and young children. | 0.858 | 4.455 | 0.193 | 0.682 | Modify |
| 89. I can plan enrollment promotion activities and create promotional videos and brochures for enrollment. | 0.429 | 4.773 | 0.090 | 0.773 | Retain |
| 90. I can promote enrollment through online and offline methods, such as WeChat official accounts, Douyin, Xiaohongshu, and face-to-face communication. | 0.671 | 4.455 | 0.151 | 0.546 | Modify |
| 91. I can promote the brand culture and educational philosophy of childcare institutions. | 0.510 | 4.455 | 0.114 | 0.455 | Modify |
| 92. I am generally capable of managing departments such as teaching and research, human resources, finance, and logistics. | 0.429 | 4.773 | 0.090 | 0.773 | Retain |
| 93. I can maintain the normal operation of WeChat official accounts, apps, and parenting websites. | 0.590 | 4.591 | 0.129 | 0.636 | Retain |

**Supplementary Material 4.**

**Results of the Second Round of Expert Consultation**

| **Item content** | **SD** | **M** | **CV** | **F** | **Result** |
| --- | --- | --- | --- | --- | --- |
| 1. I am capable of caring for and showing affection to infants and young children, possessing love, patience, and a sense of responsibility. | 0.224 | 4.950 | 0.045 | 0.950 | Retain |
| 2. I am passionate about the childcare profession and recognize the significance and value of childcare services. | 0.410 | 4.800 | 0.086 | 0.800 | Retain |
| 3. I can respect the growth characteristics and patterns of infants and young children, paying attention to individual differences. | 0.308 | 4.900 | 0.063 | 0.900 | Retain |
| 4. I am able to appropriately arrange the daily life and activities of infants and young children, maximizing their safety and health. | 0.308 | 4.900 | 0.063 | 0.900 | Retain |
| 5. I respect the legitimate rights and interests of infants, young children, and their families, consciously adhering to childcare service standards and regulations. | 0.308 | 4.900 | 0.063 | 0.900 | Retain |
| 6. I abide by professional ethics, fulfill my due obligations in childcare practice, and possess a sense of social responsibility and dedication. | 0.308 | 4.900 | 0.063 | 0.900 | Retain |
| 7. I adopt a child-centered approach, respecting the personality and rights of infants and young children, and treat each one with fairness and equality. | 0.308 | 4.900 | 0.063 | 0.900 | Retain |
| 8. I can understand the needs of infants and young children expressed through language, gestures, sounds, facial expressions, and verbal requests. | 0.308 | 4.900 | 0.063 | 0.900 | Retain |
| 9. I am skilled in interacting with infants and young children through language, as well as non-verbal communication techniques such as hugging, stroking, eye contact, and facial expressions. | 0.366 | 4.850 | 0.076 | 0.850 | Retain |
| 10. I promptly respond to the needs of infants and young children in daily activities such as eating, drinking, cleaning, and sleeping. | 0.308 | 4.900 | 0.063 | 0.900 | Retain |
| 11. I can create a warm emotional atmosphere, support infants and toddlers in expressing their emotions, and establish positive emotional attachments. | 0.000 | 5.000 | 0.000 | 1.000 | Retain |
| 12. I am proficient in methods for infants and toddlers’ hygiene practices, such as brushing teeth, washing hands, washing face, rinsing mouth, and wiping their nose. | 0.000 | 5.000 | 0.000 | 1.000 | Retain |
| 13. I can create a quiet and suitable sleep environment, fostering regular bedtimes and independent sleeping habits for infants and toddlers. | 0.224 | 4.950 | 0.045 | 0.950 | Retain |
| 14. I can recognize signs of drowsiness in infants and toddlers, assess their sleep-related mental state, and guide them in proper sleeping positions. | 0.366 | 4.850 | 0.076 | 0.850 | Retain |
| 15. I can change diapers promptly and guide infants and toddlers toward independent toilet use. | 0.224 | 4.950 | 0.045 | 0.950 | Retain |
| 16. I can create a pleasant dining environment, encouraging infants and toddlers to focus on eating without being picky about food. | 0.308 | 4.900 | 0.063 | 0.900 | Retain |
| 17. I can guide infants and toddlers to drink water from a cup, helping them develop good drinking habits. | 0.000 | 5.000 | 0.000 | 1.000 | Retain |
| 18. I can respond promptly to infants and toddlers’ feeding needs based on their hunger or fullness cues. | 0.000 | 5.000 | 0.000 | 1.000 | Retain |
| 19. I can plan and organize daily meals for infants and toddlers. | 0.224 | 4.950 | 0.045 | 0.950 | Retain |
| 20. I can introduce complementary foods and design meal plans according to the developmental characteristics of infants and toddlers at different months. | 0.444 | 4.750 | 0.094 | 0.750 | Retain |
| 21. I can assist infants and young children with feeding, prepare formula milk, and master feeding techniques. | 0.587 | 4.650 | 0.126 | 0.700 | Retain |
| 22. I can limit screen time and help infants and young children develop good eye care habits. | 0.489 | 4.650 | 0.105 | 0.650 | Retain |
| 23. I can guide infants and young children to brush their teeth on time and develop good oral hygiene habits. | 0.308 | 4.900 | 0.063 | 0.900 | Retain |
| 24. I can perform indoor and outdoor environmental cleaning and disinfection, as well as clean and store sanitary ware. | 0.366 | 4.850 | 0.076 | 0.850 | Retain |
| 25. I can clean and disinfect daily items such as bedding, toys, and bottles. | 0.000 | 5.000 | 0.000 | 1.000 | Retain |
| 26. I can guide infants and young children to develop safety awareness and understand and follow simple safety rules. | 0.308 | 4.900 | 0.063 | 0.900 | Retain |
| 27. I can promptly identify and prevent behaviors of infants and young children that may lead to dangerous consequences. | 0.000 | 5.000 | 0.000 | 1.000 | Retain |
| 28. I can reasonably allocate first aid supplies for childcare institutions. | 0.366 | 4.850 | 0.076 | 0.850 | Retain |
| 29. I can prevent and handle emergencies such as earthquakes, fires, stampedes, and violent attacks. | 0.366 | 4.850 | 0.076 | 0.850 | Retain |
| 30. I can conduct full-day health checks and record the health information of infants and young children. | 0.366 | 4.850 | 0.076 | 0.850 | Retain |
| 31. I can master the methods of air baths, sun baths, and water baths. | 0.366 | 4.850 | 0.076 | 0.850 | Retain |
| 32. I can massage the head, chest, abdomen, back, and limbs of infants and young children and perform massage techniques. | 0.489 | 4.850 | 0.101 | 0.900 | Retain |
| 33. I can care for infants and young children who have suffered severe injuries while awaiting rescue. | 0.503 | 4.600 | 0.109 | 0.600 | Retain |
| 34. I can prevent and care for common illnesses in infants and young children, such as fever, vomiting, diarrhea, convulsions, and upper respiratory infections. | 0.489 | 4.650 | 0.105 | 0.650 | Retain |
| 35. I can prevent and care for common infectious diseases in infants and young children, such as hand, foot, and mouth disease, herpangina, influenza, and chickenpox. | 0.366 | 4.850 | 0.076 | 0.850 | Retain |
| 36. I can prevent and care for common chronic diseases in infants and young children, such as congenital heart disease, asthma, and epilepsy. | 0.366 | 4.850 | 0.076 | 0.850 | Retain |
| 37. I can prevent and care for common nutritional diseases in infants and young children, such as anemia, malnutrition, overweight, and obesity. | 0.587 | 4.650 | 0.126 | 0.700 | Retain |
| 38. I can prevent common injuries in infants and young children, such as burns, bleeding, bruises, dislocations, and fractures. | 0.366 | 4.850 | 0.076 | 0.850 | Retain |
| 39. I can handle common injuries in infants and young children, such as choking, falls, drowning, poisoning, and animal-inflicted injuries. | 0.671 | 4.650 | 0.144 | 0.750 | Retain |
| 40. I can master basic emergency rescue techniques, including infant and child cardiopulmonary resuscitation (CPR). | 0.671 | 4.650 | 0.144 | 0.750 | Retain |
| 41. I can use assessment tools to evaluate the physical and mental development of infants and young children and identify developmental abnormalities. | 0.489 | 4.650 | 0.105 | 0.650 | Retain |
| 42. I can screen for oral developmental abnormalities, dental caries, visual impairments, or hearing abnormalities in infants and young children. | 0.489 | 4.650 | 0.105 | 0.650 | Retain |
| 43. I can provide early intervention and timely referrals for infants and young children with autism, developmental oral abnormalities, visual impairments, or hearing abnormalities. | 0.550 | 4.750 | 0.116 | 0.800 | Retain |
| 44. I can cooperate with professional doctors to provide correction, training, and family guidance for premature infants and children with common developmental deviations. | 0.523 | 4.800 | 0.109 | 0.850 | Retain |
| 45. I can plan daily activities for infants and young children, such as sleep, cleaning, meals, and drinking water. | 0.489 | 4.650 | 0.105 | 0.650 | Retain |
| 46. I can design indoor and outdoor play activities that align with the developmental characteristics of infants and young children. | 0.366 | 4.850 | 0.076 | 0.850 | Retain |
| 47. I have basic skills in infant rhythms, nursery rhymes, finger exercises, children's songs, storytelling, and crafts. | 0.308 | 4.900 | 0.063 | 0.900 | Retain |
| 48. I can organize and implement early development activities for infants and young children, focusing on movement, language, cognition, emotions, and social skills. | 0.489 | 4.650 | 0.105 | 0.650 | Retain |
| 49. I can sensitively observe and record the behavioral performances of infants and young children of different age groups in various activities. | 0.470 | 4.700 | 0.100 | 0.700 | Retain |
| 50. I can accurately analyze the behavioral performances of infants and young children of different age groups in various activities. | 0.470 | 4.700 | 0.100 | 0.700 | Retain |
| 51. I can scientifically evaluate the development levels of infants and young children of different age groups and propose improvement strategies. | 0.366 | 4.850 | 0.076 | 0.850 | Retain |
| 52. I can create a safe, appropriate, and exploration-friendly early development environment. | 0.510 | 4.550 | 0.112 | 0.550 | Retain |
| 53. I can provide activity materials for infants and young children and label them clearly for easy access. | 0.550 | 4.750 | 0.116 | 0.800 | Retain |
| 54. I can foster a positive classroom atmosphere for infants and young children. | 0.444 | 4.750 | 0.094 | 0.750 | Retain |
| 55. I can create a warm and nurturing teacher-infant (child) relationship. | 0.308 | 4.900 | 0.063 | 0.900 | Retain |
| 56. I can build harmonious peer relationships for infants and young children. | 0.489 | 4.650 | 0.105 | 0.650 | Retain |
| 57. I can accurately identify the developmental needs of infants and young children in movement, cognition, language, emotions, and social skills. | 0.366 | 4.850 | 0.076 | 0.850 | Retain |
| 58. I can provide guidance for the development of movement, cognition, language, emotions, and social skills in infants and young children. | 0.470 | 4.700 | 0.100 | 0.700 | Retain |
| 59. I can guide caregivers in using assessment tools to monitor the physical and mental development of infants and young children. | 0.366 | 4.850 | 0.076 | 0.850 | Retain |
| 60. I can evaluate the parenting philosophy, behaviors, and psychological well-being of caregivers. | 0.470 | 4.700 | 0.100 | 0.700 | Retain |
| 61. I can assess the area setup and spatial layout of families with infants and toddlers. | 0.587 | 4.650 | 0.126 | 0.700 | Retain |
| 62. I can guide caregivers to identify different physical constitutions of infants and toddlers and provide care accordingly. | 0.489 | 4.650 | 0.105 | 0.650 | Retain |
| 63. I can guide caregivers to identify common issues in infants' and toddlers' eating, excretion, and sleep, and respond appropriately. | 0.523 | 4.800 | 0.109 | 0.850 | Retain |
| 64. I can guide caregivers to identify abnormal behaviors in infants' and toddlers' sleep habits, eating habits, daily routines, and hygiene practices, and respond appropriately. | 0.523 | 4.800 | 0.109 | 0.850 | Retain |
| 65. I can guide caregivers to identify abnormal behaviors in infants' and toddlers' movements, cognition, language, emotions, and social interactions, and respond appropriately. | 0.550 | 4.750 | 0.116 | 0.800 | Retain |
| 66. I can communicate with caregivers about infants' and toddlers' behaviors and explain developmental assessment results. | 0.523 | 4.800 | 0.109 | 0.850 | Retain |
| 67. I can recommend suitable venues, activities, lectures, and training sessions to caregivers. | 0.587 | 4.650 | 0.126 | 0.700 | Retain |
| 68. I can guide caregivers in correcting parenting behaviors and improving the caregiving environment. | 0.489 | 4.650 | 0.105 | 0.650 | Retain |
| 69. I can guide caregivers in practicing responsive care and mastering parent-child activity techniques. | 0.489 | 4.650 | 0.105 | 0.650 | Retain |
| 70. I can plan enrollment promotion activities and create promotional videos and brochures. | 0.470 | 4.700 | 0.100 | 0.700 | Retain |
| 71. I can use platforms like WeChat, TikTok, and Xiaohongshu to promote institutional culture. | 0.571 | 4.700 | 0.122 | 0.750 | Retain |
| 72. I am generally capable of managing departments such as teaching and research, human resources, finance, and logistics. | 0.754 | 4.600 | 0.164 | 0.700 | Retain |
| 73. I can maintain the normal operation of WeChat public accounts, apps, and parenting websites. | 0.523 | 4.800 | 0.109 | 0.850 | Retain |
| 74. I can fully communicate with colleagues about infants' and toddlers' information and collaborate on activities. | 0.523 | 4.800 | 0.109 | 0.850 | Retain |
| 75. I can use digital and information technology to broaden home-communication channels. | 0.550 | 4.750 | 0.116 | 0.800 | Retain |
| 76. I can collaborate with communities to provide parenting support for parents. | 0.852 | 4.100 | 0.208 | 0.350 | Delete |
| 77. I proactively engage in interdisciplinary and cross-professional collaborative learning. | 0.470 | 4.700 | 0.100 | 0.700 | Retain |
| 78. I can identify educational resources within families to promote early childhood development. | 0.470 | 4.700 | 0.100 | 0.700 | Retain |
| 79. I can mobilize social resources to support infant and toddler development, such as organizing museum visits. | 0.813 | 4.150 | 0.196 | 0.400 | Delete |
| 80. I can promptly adjust negative emotions and prevent them from affecting work. | 0.366 | 4.850 | 0.076 | 0.850 | Retain |
| 81. I can develop practical long-term or short-term personal professional development plans. | 0.550 | 4.750 | 0.116 | 0.800 | Retain |
| 82. I proactively reflect and summarize practical experiences to improve childcare services. | 0.444 | 4.750 | 0.094 | 0.750 | Retain |
| 83. I can use critical thinking to analyze childcare practice issues and attempt solutions. | 0.366 | 4.850 | 0.076 | 0.850 | Retain |
| 84. I can conduct self-diagnosis and evaluation to improve childcare services. | 0.489 | 4.650 | 0.105 | 0.650 | Retain |
| 85. I am proficient in using thermometers, weighing scales, electronic blood pressure monitors, and smart dolls. | 0.489 | 4.650 | 0.105 | 0.650 | Retain |
| 86. I can operate intelligent simulation learning systems for infant and toddler care services. | 0.510 | 4.550 | 0.112 | 0.550 | Modify |
| 87. I can integrate video, audio, animation, and text materials related to childcare services. | 0.470 | 4.700 | 0.100 | 0.700 | Retain |
| 88. I can manage childcare service information platforms and infant and toddler growth records. | 0.489 | 4.650 | 0.105 | 0.650 | Retain |

**Supplementary Material 5**

**Preliminary professional competency scale for pre-service childcare teachers**

| **Item content** | |
| --- | --- |
|
| 1 | I am capable of caring for and nurturing infants and young children, being loving, patient, and responsible. |
| 2 | I have a passion for childcare and recognize the significance and value of childcare services. |
| 3 | I can respect the growth characteristics and patterns of infants and young children, while paying attention to individual differences. |
| 4 | I can reasonably arrange daily routines and activities for infants and young children, ensuring their safety and health to the greatest extent. |
| 5 | I can respect the legitimate rights and interests of infants, toddlers, and their families, and consciously adhere to childcare service standards and regulations. |
| 6 | I am able to adhere to professional ethics, fulfill my due responsibilities in childcare practices, and demonstrate a sense of social responsibility and commitment. |
| 7 | I can adopt an infant- and toddler-centered approach, respect their personalities and rights, and treat every child with fairness and equality. |
| 8 | I understand the need for nonverbal expression in infants and young children, such as language and movements, sounds, expressions, and verbal requests. |
| 9 | I can interact with infants and young children through language and nonverbal communication skills such as hugs, touches, eye contact, and facial expressions. |
| 10 | I can respond to the needs of infants and young children in daily activities such as eating, drinking, cleaning and sleeping. |
| 11 | I can create a warm emotional atmosphere, support the emotional expression of infants and young children, and establish positive emotional attachment. |
| 12 | I have mastered various hygiene methods for infants and young children, such as brushing teeth, washing hands, washing faces, rinsing mouths, and wiping runny noses. |
| 13 | I can create a quiet and suitable sleeping environment, and cultivate the habit of regular and independent sleeping for infants and young children. |
| 14 | I can recognize signs of drowsiness in infants and young children, assess their sleep-related mental state, and provide guidance on sleeping positions. |
| 15 | I can change diapers in a timely manner and guide infants and toddlers in using the toilet independently. |
| 16 | I can create a pleasant dining environment and cultivate healthy eating habits for infants and toddlers, such as focusing on meals and avoiding picky eating. |
| 17 | I can guide infants and young children to drink water from a cup, helping them develop good drinking habits. |
| 18 | I can promptly respond to feeding needs based on an infant's hunger or fullness cues. |
| 19 | I can respond to the hunger or fullness signals of infants and young children in a timely manner. |
| 20 | I can introduce complementary foods and create meal plans according to the developmental characteristics of infants based on their age in months. |
| 21 | I can assist infants and young children with feeding, prepare formula milk, and have mastered bottle-feeding techniques. |
| 22 | I will limit screen time to help infants and young children develop good eye habits. |
| 23 | I can guide infants and young children to brush their teeth on time and help them develop good oral hygiene habits. |
| 24 | I am capable of handling the cleaning and disinfection of both indoor and outdoor environments, as well as washing and storing sanitary ware. |
| 25 | I can handle the cleaning and disinfection of daily items such as bedding, toys, and baby bottles. |
| 26 | I can guide infants and young children to develop safety awareness, understand, and follow simple safety rules. |
| 27 | I can promptly detect and prevent infants and young children from engaging in behaviors that could lead to dangerous consequences. |
| 28 | I can rationally allocate emergency supplies to childcare institutions. |
| 29 | I can prevent and deal with emergencies such as earthquakes, fires, stampedes and violent attacks. |
| 30 | I am capable of performing full-day health checks and recording the health information of infants and young children. |
| 31 | I can master the operation of air bath, sun bath and water bath. |
| 32 | I can massage the head, chest, abdomen, back and limbs of infants and young children, and I am skilled in massage techniques. |
| 33 | I can provide care for infants and young children who have suffered severe injuries and are awaiting rescue. |
| 34 | I can prevent and manage common illnesses in infants and young children, such as fever, vomiting, diarrhea, convulsions, and upper respiratory tract infections. |
| 35 | I can prevent and care for common infectious diseases in infants and young children such as hand, foot, and mouth disease, herpangina, influenza, and chickenpox. |
| 36 | I can prevent and manage common chronic diseases in infants and young children, such as congenital heart disease, asthma, and epilepsy. |
| 37 | I am capable of preventing and managing common nutritional disorders in infants and young children, such as anemia, malnutrition, overweight, and obesity. |
| 38 | I am capable of effectively preventing common injuries in infants and young children, such as burns, traumatic bleeding, bumps, dislocations, and fractures. |
| 39 | I am capable of handling common injuries such as infant choking, fall injuries, drowning, poisoning, and animal-related injuries. |
| 40 | I can master basic first aid techniques and perform CPR on infants and young children. |
| 41 | I can assess the physical and mental development of infants and young children using evaluation tools and identify any developmental abnormalities. |
| 42 | I can screen for abnormal oral development, dental caries, subnormal vision, or hearing abnormalities in infants and young children. |
| 43 | I am capable of providing early intervention and making timely referrals for infants and toddlers with autism spectrum disorders, oral development abnormalities, or visual and hearing impairments. |
| 44 | I can collaborate with professional doctors to provide correction, training, and family guidance for premature infants and infants with common developmental deviations. |
| 45 | I can plan the daily activities of infants and young children, such as sleep, cleaning, eating and drinking. |
| 46 | I can design indoor and outdoor play activities that align with the developmental characteristics of infants and toddlers based on their age in months. |
| 47 | I have mastered skills such as infant movement, nursery rhymes, finger exercises, children's songs, storytelling, and handicrafts. |
| 48 | I can organize and implement early childhood development activities focusing on motor skills, language, cognition, emotional development, and social skills. |
| 49 | I am able to keenly observe and record the behavioral performance of infants across different age groups in months during various activities. |
| 50 | I am able to accurately analyze the behavioral performances of infants and young children across various activities at different age stages in months. |
| 51 | I can scientifically assess the development levels of infants at different age stages and propose improvement strategies. |
| 52 | I can create a safe, appropriate, and free-exploration-friendly early development environment. |
| 53 | I can prepare activity materials for infants and toddlers and clearly label them for easy access. |
| 54 | I can create a positive classroom atmosphere for infants and toddlers. |
| 55 | I can create a warm teacher-infant/child relationship for infants and young children. |
| 56 | 56 I can build harmonious peer relationships for infants and young children. |
| 57 | I can correctly identify the needs of infants and young children in the areas of movement, cognition, language, emotion and social development. |
| 58 | I can provide guidance for the physical, cognitive, linguistic, and socioemotional development of infants and toddlers. |
| 59 | I can guide caregivers in using assessment tools to monitor the physical and mental development of infants and young children. |
| 60 | I can assess the parenting philosophy, parenting behavior and psychological state of the parent. |
| 61 | I can assess the area setting and spatial layout of the infant and young child family. |
| 62 | I can guide caregivers to identify different constitutions of infants and young children and to provide appropriate care. |
| 63 | I can guide caregivers to identify common problems and respond correctly to infants and young children during feeding, urination, defecation and sleep. |
| 64 | I can guide caregivers to identify abnormal manifestations of infants and young children's sleep habits, eating habits, life and hygiene habits and respond correctly. |
| 65 | I can guide caregivers to identify and respond to abnormalities in infants and young children in terms of physical, cognitive, language, emotional and social development. |
| 66 | I can communicate with caregivers about the infant's or toddler's performance and explain the results of developmental assessments. |
| 67 | I can recommend suitable venues, activities, lectures, and training sessions for caregivers. |
| 68 | I can guide caregivers in correcting parenting behaviors and improving the caregiving environment. |
| 69 | I can guide caregivers in responsive care and master parent-child activity skills. |
| 70 | I can design indoor and outdoor play activities that align with the developmental characteristics of infants and toddlers based on their age in months. |
| 71 | I will use digital technology and information technology to broaden the communication channels between home and school. |
| 72 | I can take the initiative to carry out interdisciplinary and cross-professional cooperative learning. |
| 73 | I can tap into educational resources within my family to promote early development of infants and young children. |
| 74 | I can fully communicate infant information with colleagues and collaboratively organize activities. |
| 75 | I can develop a practical long-term or short-term personal professional development plan. |
| 76 | I will take the initiative to reflect and summarize practical experiences to improve childcare services. |
| 77 | I will take the initiative to reflect and summarize practical experiences to improve childcare services. |
| 78 | I can self-diagnose and self-assess to improve my work in childcare services. |
| 79 | I can skillfully use a thermometer, a scale, an electronic blood pressure monitor and a smart doll. |
| 80 | I can use the intelligent infant care service simulation learning platform. |
| 81 | I can integrate video, audio, animation and text materials related to childcare services. |
| 82 | I can manage the information platform of childcare services and the growth records of infants and young children. |
| 83 | I can plan recruitment campaigns, produce promotional videos and brochures. |
| 84 | I can promote the culture of the organization through WeChat, TikTok, Xiaohongshu, and other methods. |
| 85 | I can manage the teaching and research, personnel, finance, logistics and other departments. |
| 86 | I can ensure the smooth operation of WeChat Official Accounts, mobile apps, and parenting websites. |
